# 1 **CaptureCompendium: a comprehensive toolkit for 3C analysis.**

2 Jelena M. Telenius<sup>1,\*</sup>, Damien J. Downes<sup>2,\*</sup>, Martin Sergeant<sup>1,\*</sup>, A. Marieke Oudelaar<sup>1,2</sup>, Simon  
3 McGowan<sup>1</sup>, Jon Kerry<sup>1</sup>, Lars L.P. Hanssen<sup>2</sup>, Ron Schwessinger<sup>1</sup>, Chris Q. Eijsbouts<sup>3,4</sup>, James  
4 O.J. Davies<sup>2</sup>, Stephen Taylor<sup>1</sup>, Jim R. Hughes<sup>1,2,†</sup>.

5 \* These authors contributed equally: Jelena M. Telenius, Damien J. Downes, Martin Sergeant.

6 † Corresponding author: [jim.hughes@imm.ox.ac.uk](mailto:jim.hughes@imm.ox.ac.uk)

7

8 1. MRC WIMM Centre for Computational Biology, MRC Weatherall Institute of Molecular  
9 Medicine, University of Oxford, Oxford, UK

10 2. MRC Molecular Haematology Unit, MRC Weatherall Institute of Molecular Medicine,  
11 University of Oxford, Oxford, UK

12 3. Big Data Institute, Li Ka Shing Centre for Health Information and Discovery, University  
13 of Oxford, Oxford, UK

14 4. Wellcome Centre for Human Genetics, Nuffield Department of Medicine, University of  
15 Oxford, Oxford, UK

16

17

18 **Keywords:** 3C, chromosome conformation capture, Capture-C, software.

19 **ABSTRACT**

20 **DNA folding within nuclei is a highly ordered process, with implications for gene**  
21 **regulation and development. An array of chromosome conformation capture (3C)**  
22 **methods have been developed to investigate how DNA is packaged within nuclei and to**  
23 **interrogate specific interactions. While these methods use different approaches to**  
24 **examine target loci (many-versus-all) or the entire genome (all-versus-all), they all rely on**  
25 **the core principle of endonuclease digestion and proximity-based ligation to re-arrange**  
26 **genomic order to reflect the three-dimensional nuclear conformation. This sequence**  
27 **reorganization creates novel chimeric DNA fragments which require specialist**  
28 **bioinformatic tools to analyze and visualize. Despite this need for specialist bioinformatic**  
29 **skills, the core biological importance of genome folding has seen widespread**  
30 **methodological uptake. To service the needs of experimentalists using the many-versus-**  
31 **all Capture-C family of methods we have developed CaptureCompendium; a toolkit of**  
32 **software to simplify the design, analysis and presentation of 3C experiments.**

## 33 Introduction

34 The arrangement of the genome into the nucleus is highly regulated to facilitate correct  
35 interactions between promoters and their requisite enhancers. Chromosome conformation  
36 capture (3C) has emerged as a highly malleable method for studying both local and global trends  
37 in genome folding<sup>1</sup>. All 3C methods rely on the underlying principle that following DNA digestion,  
38 generally with a restriction endonuclease (RE), fragment ends in proximity will ligate together at  
39 high frequency. This digestion and proximity driven ligation functions to re-organize the linear  
40 genome sequence to reflect its 3D structure<sup>2</sup>. This re-organized sequence is then examined  
41 primarily by targeted high-resolution many-versus-all approaches, e.g. NG Capture-C<sup>3</sup>, 4C-seq<sup>4</sup>,  
42 UMI-4C<sup>5</sup>, i4C-seq<sup>6</sup>, and Tri-C<sup>7</sup>; or lower resolution approaches across the genome, e.g. HiC<sup>8</sup>  
43 and Capture-HiC<sup>9</sup>.

44  
45 The importance of genome folding to transcriptional regulation has brought about the application  
46 of 3C methods to investigate a range of questions, including basic biological problems and the  
47 identification of disease relevant gene-to-polymorphism interactions<sup>10,11</sup>. Owing to the enhanced  
48 signal provided by targeted sequencing, oligonucleotide capture methods, based on Capture-  
49 C<sup>3,7,9,12-14</sup>, are emerging as a preferred method to look at loci of interest. A standard Capture-C  
50 experiment consists of three main bioinformatic components: target selection and  
51 oligonucleotide probe design; sequence mapping with read classification; and statistical  
52 comparison with data presentation. For each of these processes an array of software tools is  
53 available, including HiCapTools<sup>15</sup>, GOPHER<sup>16</sup>, Capsequm<sup>12</sup>, capC-MAP<sup>17</sup>, FourCSeq<sup>18</sup>,  
54 peakC<sup>19</sup>, CHiCAGO<sup>20</sup>, peaky<sup>21</sup>, ChiCMaxima<sup>22</sup>, HiC-Pro<sup>23</sup>, and 4See<sup>24</sup>; yet, to date no  
55 comprehensive pipeline for the complete design, mapping and interpretation of 3C experiments  
56 has been made available. This lack of an easily implemented, automated workflow for Capture-  
57 C based experiments forms a barrier to the general use of such methods, particularly in non-  
58 specialist groups. To address this need we have developed the CaptureCompendium toolkit  
59 (Fig. 1) which combines oligonucleotide design (Capsequm2), sequence mapping and data  
60 extraction (CCseqBasic), and statistical analyses with data presentation and distribution  
61 (CaptureCompare, Tri-C, CaptureSee). This workflow streamlines the bioinformatic process  
62 required to generate high quality 3C data using Capture-C experiments.

## 63 RESULTS

### 64 ***Capsequm2: A user-friendly interface for probe design.***

65 Targeted enrichment with biotinylated DNA oligonucleotides forms the basic tenet of Capture-C  
66 methods<sup>3</sup>. Probe design is essential to a successful experiment; probes must be situated near  
67 to a RE cut site, be proximal to the object of interest, and not be located on a highly repetitive  
68 element. These parameters allow for enrichment of informative on-target chimeric sequencing  
69 fragments, while simultaneously avoiding off-target sequencing. Currently, we know of three  
70 tools are available for probe design: HiCapTools - a command line-based method<sup>15</sup>, GOPHER  
71 – an installable JAVA package<sup>16</sup>, and Capsequm – an online interface<sup>12</sup>. As a webtool,  
72 Capsequm provides the most user-friendly option for initial probe design but previously required  
73 integration with MIG<sup>25</sup>, a registration-based service, for probe filtering.

74  
75 We redeveloped Capsequm (<http://apps.molbiol.ox.ac.uk/CaptureC/cgi-bin/CapSequm.cgi>) with  
76 a web-based filtering portal (AltSort) to generate Capsequm2 (Fig. 2). Capsequm2 allows  
77 researchers to select from a range of 11 genomes covering seven species and the five  
78 commonly used RE, as well as allowing a choice in probe length for design to targets of interest.  
79 Following fragment identification and BLAT processing, probes can be filtered using AltSort. In  
80 AltSort probes filtering are automatically categorised as good or bad using recommended  
81 settings for duplication number, BLAT density score (measuring likely off-target capture) (Kent  
82 2002), G/C content, CpG content and, repeat content (Table 1). Probes can be visually  
83 inspected with integrated UCSC browser tracks, and the default parameters adjusted for all or  
84 specific regions of interest. Upon selection of desired probes, users can then download the  
85 oligonucleotide sequences, ready for ordering. This download also provides correctly formatted  
86 viewpoint input files required for subsequent analysis with the downstream tools CCseqBasic  
87 and CaptureCompare.

88

89 **Table 1. Default AltSort parameters for probe design.**

| Filter        | “Good”     | “Bad”     |
|---------------|------------|-----------|
| Duplicates    | $\leq 2^*$ | $\geq 3$  |
| Density       | $\leq 40$  | $> 40$    |
| % G/C content | $\leq 60$  | $\geq 60$ |
| Repeat        | False      | True      |

90 \*Often interactions at duplicated genes, e.g. *Hba-1*, *Hba-2*, can still be understood.

91

### 92 ***CCseqBasic: Data extraction and quality control.***

93 Analysis of sequencing data with the CCseqBasic command line tool (Fig. 3a) is launched using  
94 the probe design parameter file provided by AltSort. Enriched chimeric fragments from the

95 Capture-C family of methods, NG Capture-C, LI-Capture-C, Tag Capture-C, Tri-C, are generally  
96 sequenced using 150-bp paired-end reads<sup>3,7,13,26</sup>; this gives 300-bp of total sequence, therefore  
97 the majority of read-pairs overlap and the chimeric fragment can be reconstructed through  
98 flashing<sup>27</sup>. RE sites in chimeric fragments generated from 3C digestion and ligation are then  
99 identified in both flashed and non-flashed reads and digested-*in silico*. These digested reads  
100 are then mapped and categorised as capture, occurring within a targeted RE fragment, or  
101 reporter, occurring in any other fragment. Because Capture-C methods use sonication or  
102 tagmentation to generate random ends for reads, they can then be PCR duplicate filtered. All of  
103 these steps are carried out automatically by CCseqBasic with minimal user input. The main  
104 output of CCseqBasic is a convenient UCSC-loadable data hub which contains reporter tracks  
105 for each viewpoint (Fig. 4), complete with sample quality control metrics for 3C library quality  
106 and enrichment efficiency (Fig. 3b), as well as sequence quality control in the form of fastQC  
107 reports. Additionally, all generated data is stored in an easy-to-follow hierarchical folder structure  
108 allowing re-analysis, or immediate further processing with CaptureCompare or Tri-C.

109

### 110 ***Tri-C: Investigation of 3-way interaction hubs.***

111 Most 3C methods interrogate single, pairwise interactions to generate a population view of  
112 interaction frequencies. Recently, interest has been given to the formation of multi-way  
113 interaction hubs<sup>28-30</sup>. By enriching for chimeric fragments containing multiple ligation junctions,  
114 Tri-C allows investigation of these multi-way interactions from single-alleles<sup>7</sup>. Tri-C interaction  
115 matrices are generated using an optional flag, which can be implemented during either the initial  
116 run or re-analysis with CCseqBasic. When using Tri-C analysis, users can specify the genomic  
117 regions to analyse, sonication fragment size, and bin size to match their specific experiment.  
118 The output of this analysis is a pdf of an interaction matrix for the region surrounding the  
119 viewpoint of interest (Fig 5.).

120

### 121 ***CaptureCompare: Statistical analysis and sample comparison.***

122 A major strength of Capture-C methods is their ability to confidently distinguish PCR duplicates,  
123 while simultaneously generating data from multiple replicates and cell types by multiplexing  
124 samples<sup>3</sup>. This allows experiments to be designed with advanced statistical analysis in mind,  
125 such as the comparison between cell types, differentiation states, genetic models, drug  
126 treatment or any other biological question of interest. As with analysis by CCseqBasic,  
127 CaptureCompare is implemented using a command line interface and AltSort-generated  
128 parameter file. CaptureCompare extracts the raw interaction count data for each viewpoint from  
129 replicates of multiple conditions and generates a UCSC loadable hub containing normalised  
130 mean interactions, standard deviation, and difference in interaction level for different conditions  
131 on a per RE fragment basis (Fig. 4). Additionally, CaptureCompare generates and implements

132 a modifiable R script for DESeq2 analysis<sup>31</sup>, which compares RE fragments to determine if  
133 observed differences between conditions reach significance. CaptureCompare also automates  
134 the preparation of the necessary files for more complex interaction frequency analysis via the  
135 Bayesian modelling tool peaky<sup>21</sup>. Finally, to facilitate presentation, a pdf is generated for each  
136 viewpoint with publication-style windowed interaction profiles (Fig. 4).

137

### 138 ***CaptureSee: A simple interface for navigating and sharing experiments.***

139 On-going methodological improvements have increased the ability of Capture-C methods to  
140 target thousands rather than tens to hundreds of loci. Exploration of these large datasets is  
141 difficult when using the UCSC browser. To facilitate easy interaction with 3C data, and provide  
142 a platform for sharing results, we developed the web-based platform CaptureSee. CaptureSee  
143 takes the output hub from CaptureCompare to generate a browsable repository of viewpoints in  
144 both per RE fragment and windowed formats (Fig 6.). Within CaptureSee users can quickly jump  
145 between capture viewpoints in the genome, to see both the total number and percent of *cis*  
146 reporter counts for each viewpoint on a per sample basis, and filter DESeq2 results to find  
147 significantly interacting RE fragments.

148

## 149 **DISCUSSION**

150 The importance of genome folding for gene regulation has come to the fore in recent years. An  
151 extensive array of techniques in fixed and native cells has been developed to examine this  
152 folding based on the premise of proximity ligation. Despite being based on a simple premise, 3C  
153 sequencing generates a complex bioinformatic problem of mapping and interpreting chimeric  
154 DNA fragments. To meet this need, an equally wide range of tools have been developed to  
155 either design experiments<sup>12,15,16</sup>, map sequence reads<sup>3,17</sup>, or interpret interaction profiles<sup>18–22</sup>.  
156 While some of these tools have been developed with a non-bioinformatically trained user in  
157 mind, many are complex to implement. The absence of a coherent analysis workflow  
158 necessitates the definition and testing of appropriate solutions and tools for each step of design,  
159 analysis, interpretation and visualisation which must then be assembled into a functioning  
160 bioinformatics pipeline, before such experiments can be productively undertaken. This has  
161 slowed the general uptake into other fields, such as genetics, clinical studies and developmental  
162 biology, though Capture-C methods have proven utility in these areas<sup>10,32–41</sup>.

163

164 We have generated a systematic, semi-automated workflow for the design and analysis of  
165 Capture-C based 3C experiments. This pipeline is constructed with the end-user in mind,  
166 including easy to navigate web tools where computationally possible. For the command line  
167 tools the default settings will suffice for general use, and user input is only required at three  
168 stages. More advanced users will find their needs met, with options and flags available at all

169 stages to customise analysis – such as the choice in mapping algorithm or using SNPs to  
170 produce allele-specific profiles<sup>3</sup>. Furthermore, the availability of well-documented open source  
171 software in commonly used programming languages (Unix, perl, R) means further modifications  
172 can be easily incorporated. Therefore, CaptureCompendium represents a significant advance  
173 for the implementation of capture-based 3C methodologies that will enable widespread use of  
174 these powerful techniques to explore genomes structure.

## 175 **METHODS**

176 Capture-C data presented in this work are available on GEO (GSE129378) and can be  
177 visualised at ([http://capturesee.molbiol.ox.ac.uk/projects/capture\\_compare/1387](http://capturesee.molbiol.ox.ac.uk/projects/capture_compare/1387)). The Tri-C  
178 interaction profile was generated from published data<sup>7</sup> (GSE107755). CaptureCompendium with  
179 links to software, installation guide, usage manual and tutorial vignettes is available online  
180 (<http://userweb.molbiol.ox.ac.uk/public/telenius/CaptureCompendium/>). Capsequm2, AltSort  
181 and CaptureSee are available as web tools with full descriptions on the websites  
182 (<http://apps.molbiol.ox.ac.uk/CaptureC/cgi-bin/CapSequm.cgi> and  
183 <https://capturesee.molbiol.ox.ac.uk/>). To facilitate saving and sharing data, CaptureSee requires  
184 users to register for a free account. CCseqBasic is modified from previous published versions<sup>3</sup>,  
185 and now contains Tri-C. CCseqBasic is available on GitHub ([https://github.com/Hughes-  
186 Genome-Group/CCseqBasicS](https://github.com/Hughes-Genome-Group/CCseqBasicS)) and implements a suite of tools to analyse data. Briefly adaptor  
187 sequences a trimmed with TrimGalore  
188 ([https://www.bioinformatics.babraham.ac.uk/projects/trim\\_galore/](https://www.bioinformatics.babraham.ac.uk/projects/trim_galore/)), reads are flashed using  
189 FLASH<sup>27</sup>, then *in silico* digested, and mapped with either bowtie or bowtie2<sup>42,43</sup>. Read quality is  
190 measured at multiple stages of processing using FastQC  
191 (<http://www.bioinformatics.babraham.ac.uk/projects/fastqc/>). Reads are classified as capture or  
192 reporter depending on mapping location and PCR duplicates are filtered based on duplication  
193 of random end pairs generated by sonication. Skew arising from co-capture from  
194 oligonucleotides at two independent viewpoints is excluded by masking all viewpoints included  
195 within a Capture-C experiment. CaptureCompare is available on github  
196 (<https://github.com/Hughes-Genome-Group/CaptureCompare>), and uses custom perl and R  
197 scripts to analyse each viewpoint independently by normalising reads per 100,000 *cis*  
198 interactions, combining replicates using BEDtools<sup>44</sup>, generating mean and subtraction data and  
199 inputting read counts into DESeq2<sup>31</sup> treating each restriction fragment as an individual object.  
200 Bedgraphs are converted to bigwigs with deepTools<sup>45</sup>. Windowed plots are generated with  
201 adjustable bin and window sizes using custom R scripts.

202

## 203 **Acknowledgements**

204 This work was carried out as part of the WIGWAM Consortium (Wellcome Investigation of  
205 Genome Wide Association Mechanisms) funded by a Wellcome Trust Strategic Award  
206 (106130/Z/14/Z) and Medical Research Council (MRC) Core Funding (MC\_UU\_12009). We  
207 wish to thank all the testers and users of the tools, particularly Duantida Songdej and Nigel  
208 Roberts, for dedicated and detailed error reporting and alpha testing, and Jason Torres and  
209 Gabriele Mingiolini for portability testing. We acknowledge the CCB computational cluster and  
210 the AVI research group for providing the computational resources and system administration  
211 for the software development and production runs. Wellcome Trust Doctoral Programmes



212 supported R.S. (203728/Z/16/Z), C.Q.E. (203141/Z/16/Z), A.M.O. (105281/Z/14/Z) and L.L.P.H  
213 (099684/Z/12/Z). A.M.O was also supported by the Stevenson Junior Research Fellowship  
214 (University College, Oxford). J.O.J.D. is funded by an MRC Clinician Scientist Award  
215 (MR/R008108) and received Wellcome Trust Support (098931/Z/12/Z).

216

217 **Competing Interests**

218 J.R.H and J.O.J.D are founders and shareholders of Nucleome Therapeutics.

219 **References**

- 220 1. Dekker, J., Rippe, K., Dekker, M. & Kleckner, N. Capturing Chromosome Conformation.  
221 *Science (80-. )*. **295**, 1306–1311 (2002).
- 222 2. Davies, J. O. J., Oudelaar, A. M., Higgs, D. R. & Hughes, J. R. How best to identify  
223 chromosomal interactions: a comparison of approaches. *Nat. Methods* **14**, 125–134  
224 (2017).
- 225 3. Davies, J. O. J. *et al.* Multiplexed analysis of chromosome conformation at vastly  
226 improved sensitivity. *Nat. Methods* **13**, 74–80 (2016).
- 227 4. Simonis, M. *et al.* Nuclear organization of active and inactive chromatin domains  
228 uncovered by chromosome conformation capture–on-chip (4C). *Nat. Genet.* **38**, 1348–  
229 1354 (2006).
- 230 5. Schwartzman, O. *et al.* UMI-4C for quantitative and targeted chromosomal contact  
231 profiling. *Nat. Methods* **13**, 685–91 (2016).
- 232 6. Brant, L. *et al.* Exploiting native forces to capture chromosome conformation in  
233 mammalian cell nuclei. *Mol Syst Biol* **12**, 1–8 (2016).
- 234 7. Oudelaar, A. M. *et al.* Single-allele chromatin interactions identify regulatory hubs in  
235 dynamic compartmentalized domains. *Nat. Genet.* **50**, 1744–1751 (2018).
- 236 8. Lieberman-Aiden, E. *et al.* Comprehensive Mapping of Long-Range Interactions  
237 Reveals Folding Principles of the Human Genome. *Science (80-. )*. **326**, 289–293  
238 (2009).
- 239 9. Mifsud, B. *et al.* Mapping long-range promoter contacts in human cells with high-  
240 resolution capture Hi-C. *Nat. Genet.* **47**, 598–606 (2015).
- 241 10. Downes, D. J. *et al.* An integrated platform to systematically identify causal variants and  
242 genes for polygenic human traits. *bioRxiv* 813618 (2019). doi:10.1101/813618
- 243 11. Baxter, J. S. *et al.* Capture Hi-C identifies putative target genes at 33 breast cancer risk  
244 loci. *Nat. Commun.* **9**, (2018).
- 245 12. Hughes, J. R. *et al.* Analysis of hundreds of cis-regulatory landscapes at high resolution  
246 in a single, high-throughput experiment. *Nat. Genet.* **46**, 205–12 (2014).
- 247 13. Oudelaar, A. M., Davies, J. O. J., Downes, D. J., Higgs, D. R. & Hughes, J. R. Robust  
248 detection of chromosomal interactions from small numbers of cells using low-input  
249 Capture-C. *Nucleic Acids Res.* **45**, (2017).
- 250 14. Oudelaar, A. M. *et al.* Dissection of the 4D chromatin structure of the  $\alpha$ -globin locus  
251 through in vivo erythroid differentiation with extreme spatial and temporal resolution.  
252 *bioRxiv* 763763 (2019). doi:10.1101/763763
- 253 15. Anil, A., Spalinskas, R., Åkerborg, Ö. & Sahlén, P. HiCapTools: a software suite for  
254 probe design and proximity detection for targeted chromosome conformation capture  
255 applications. *Bioinformatics* **34**, 675–677 (2018).

- 256 16. Hansen, P. *et al.* GOPHER: Generator Of Probes for capture Hi-C Experiments at high  
257 Resolution. *BMC Genomics* **20**, 40 (2019).
- 258 17. Buckle, A., Gilbert, N., Marenduzzo, D. & Brackley, C. A. capC-MAP: software for  
259 analysis of Capture-C data. *Bioinformatics* (2019). doi:10.1093/bioinformatics/btz480
- 260 18. Klein, F. A. *et al.* FourCSeq: analysis of 4C sequencing data. *Bioinformatics* **31**, 3085–  
261 3091 (2015).
- 262 19. Geeven, G., Teunissen, H., de Laat, W. & de Wit, E. peakC: a flexible, non-parametric  
263 peak calling package for 4C and Capture-C data. *Nucleic Acids Res.* **46**, e91–e91  
264 (2018).
- 265 20. Cairns, J. *et al.* CHiCAGO: robust detection of DNA looping interactions in Capture Hi-C  
266 data. *Genome Biol.* **17**, 127 (2016).
- 267 21. Eijsbouts, C. Q., Burren, O. S., Newcombe, P. J. & Wallace, C. Fine mapping chromatin  
268 contacts in capture Hi-C data. *BMC Genomics* **20**, 77 (2019).
- 269 22. Ben Zouari, Y., Molitor, A. M., Sikorska, N., Pancaldi, V. & Sexton, T. ChiCMaxima: a  
270 robust and simple pipeline for detection and visualization of chromatin looping in  
271 Capture Hi-C. *Genome Biol.* **20**, 102 (2019).
- 272 23. Servant, N. *et al.* HiC-Pro: an optimized and flexible pipeline for Hi-C data processing.  
273 *Genome* 1–11 (2015). doi:10.1186/s13059-015-0831-x
- 274 24. Ben Zouari, Y., Platania, A., Molitor, A. M. & Sexton, T. 4See: A Flexible Browser to  
275 Explore 4C Data. *Front. Genet.* **10**, 1–13 (2020).
- 276 25. McGowan, S. J., Hughes, J. R., Han, Z. P. & Taylor, S. MIG: Multi-Image Genome  
277 viewer. *Bioinformatics* **29**, 2477–2478 (2013).
- 278 26. Oudelaar, A. M., Downes, D., Davies, J. & Hughes, J. Low-input Capture-C: A  
279 Chromosome Conformation Capture Assay to Analyze Chromatin Architecture in Small  
280 Numbers of Cells. *BIO-PROTOCOL* **7**, (2017).
- 281 27. Magoc, T. & Salzberg, S. L. FLASH: fast length adjustment of short reads to improve  
282 genome assemblies. *Bioinformatics* **27**, 2957–2963 (2011).
- 283 28. Zheng, M. *et al.* Multiplex chromatin interactions with single-molecule precision. *Nature*  
284 **566**, 558–562 (2019).
- 285 29. Allahyar, A. *et al.* Enhancer hubs and loop collisions identified from single-allele  
286 topologies. *Nat. Genet.* **50**, 1151–1160 (2018).
- 287 30. Oudelaar, A. M. *et al.* A revised model for promoter competition based on multi-way  
288 chromatin interactions at the  $\hat{\pm}$ -globin locus. *Nat. Commun.* (2019).  
289 doi:10.1038/s41467-019-13404-x
- 290 31. Love, M. I., Huber, W. & Anders, S. Moderated estimation of fold change and dispersion  
291 for RNA-seq data with DESeq2. *Genome Biol.* **15**, 1–21 (2014).
- 292 32. Simon, C. S. *et al.* Functional characterisation of cis -regulatory elements governing

- 293 dynamic Eomes expression in the early mouse embryo. *Development* **144**, 1249–1260  
294 (2017).
- 295 33. Thurner, M. *et al.* Integration of human pancreatic islet genomic data refines regulatory  
296 mechanisms at Type 2 Diabetes susceptibility loci. *Elife* **7**, 1–30 (2018).
- 297 34. Brown, J. M. *et al.* A tissue-specific self-interacting chromatin domain forms  
298 independently of enhancer-promoter interactions. *Nat. Commun.* **9**, 1–15 (2018).
- 299 35. Schäfer, A. *et al.* Impaired DNA demethylation of C / EBP sites causes premature  
300 aging. *Genes Dev.* **32**, 742–762 (2018).
- 301 36. Godfrey, L. *et al.* DOT1L inhibition reveals a distinct subset of enhancers dependent on  
302 H3K79 methylation. *Nat. Commun.* **10**, 1–15 (2019).
- 303 37. Blackledge, N. P. *et al.* PRC1 Catalytic Activity Is Central to Polycomb System Function.  
304 *Mol. Cell* **77**, 1–18 (2020).
- 305 38. Rhodes, J. D. P. *et al.* Cohesin Disrupts Polycomb-Dependent Chromosome  
306 Interactions in Embryonic Stem Cells. *Cell Rep.* **30**, 820–835 (2020).
- 307 39. Furlan, G. *et al.* The Ftx Noncoding Locus Controls X Chromosome Inactivation  
308 Independently of Its RNA Products Article. *Mol. Cell* **70**, 462–472 (2018).
- 309 40. van Bommel, J. G. *et al.* The bipartite TAD organization of the X-inactivation center  
310 ensures opposing developmental regulation of Tsix and Xist. *Nat. Genet.* **51**, (2019).
- 311 41. Hyle, J. *et al.* Acute depletion of CTCF directly affects MYC regulation through loss of  
312 enhancer–promoter looping. *Nucleic Acids Res.* **47**, 6699–6713 (2019).
- 313 42. Langmead, B., Trapnell, C., Pop, M. & Salzberg, S. L. Ultrafast and memory-efficient  
314 alignment of short DNA sequences to the human genome. *Genome Biol.* **10**, R25  
315 (2009).
- 316 43. Langmead, B. & Salzberg, S. L. Fast gapped-read alignment with Bowtie 2. *Nat.*  
317 *Methods* **9**, 357–359 (2012).
- 318 44. Quinlan, A. R. & Hall, I. M. BEDTools: A flexible suite of utilities for comparing genomic  
319 features. *Bioinformatics* **26**, 841–842 (2010).
- 320 45. Ramírez, F. *et al.* deepTools2: a next generation web server for deep-sequencing data  
321 analysis. *Nucleic Acids Res.* **44**, W160–W165 (2016).
- 322

323 **FIGURES**

324

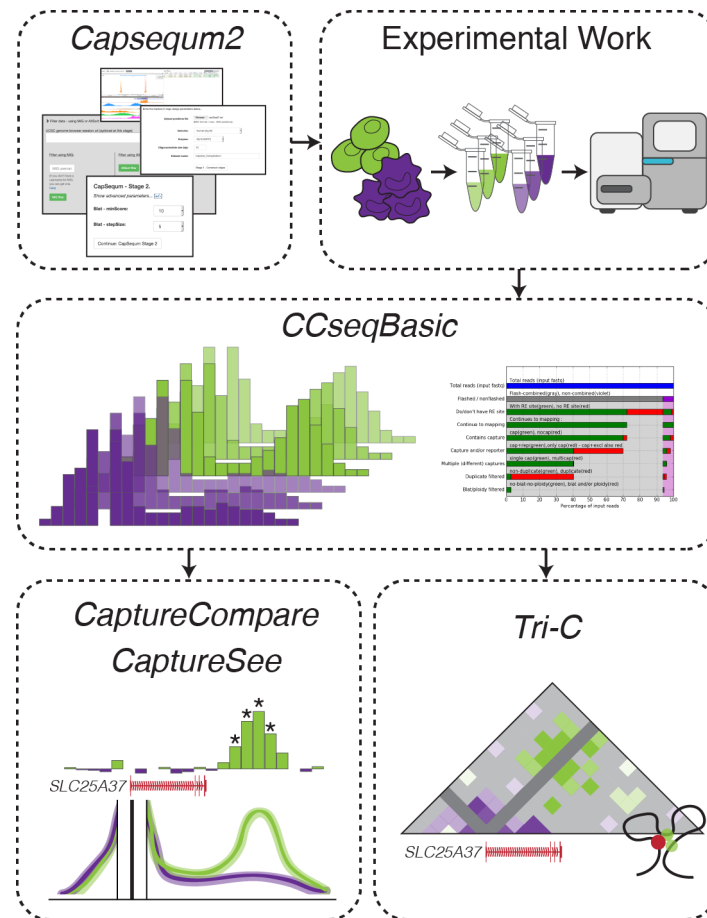

325

326

327 **Figure 1 | Overview of CaptureCompendium.** Biotinylated oligonucleotides for 3C  
328 experiments can be designed using Capsequm2. Following the experimental work, individual  
329 samples are analysed and QC is performed in CCseqBasic. Whole experiments, with replicates  
330 and comparators are analysed in CaptureCompare and visualized in CaptureSee. Multi-  
331 interaction hubs in Tri-C can also be detected using CCseqBasic.

### Stage 1: Co-ordinate input

Enter the Capture-C oligo design parameters below...

Upload positions file  slc25a37.txt  
(BED format / max. 1000 positions):

Genome:

Enzyme:

Oligonucleotide size (bp):

Dataset name:

### Stage 2: BLAT Calculation

**CapSequm - Stage 2.**

Show advanced parameters...

Blat - minScore:

Blat - stepSize:

### Stage 3: Oligonucleotide Filtering

Choice of genome, enzyme and probe length.

Filter data - using MIG or AltSort:

UCSC genome browser session url (optional at this stage):

Filter using MIG:   
(if you don't have a username for MIG, you can get one, [here](#))

Filter using Alternative Sorting:

Automated & checkbox selection of probes.

| Selected                            | name     | Chrom | Start    | End      | Duplica... | TDuplica... | Simple... | TSRepe... | BLATed | Blat De...  |
|-------------------------------------|----------|-------|----------|----------|------------|-------------|-----------|-----------|--------|-------------|
| <input checked="" type="checkbox"/> | Slc25a37 | chr8  | 23386616 | 23386686 | FALSE      | 1           | FALSE     | 0         | TRUE   | 4.3         |
| <input type="checkbox"/>            | Slc25a37 | chr8  | 23385780 | 23385850 | FALSE      | 1           | FALSE     | 0         | TRUE   | 4.871428... |

UCSC linked browser with viewpoints and oligonucleotide BLAT density score

Customisable Filters

Filter

Blat Density

332

333

334 **Figure 2 | CapSequm2 provides a user-friendly web interface for oligonucleotide design.**

335 The online tool allows design to desired capture locations with selection of genome from Human  
 336 (hg18/19/38), Mouse (mm9, mm10), Chimpanzee (panTro3), Zebrafish (danRer7, danRer10),  
 337 *Drosophila melanogaster* (dm3), Chicken (galGal4, galGal5), & Sickleback (BROADS1), of  
 338 enzyme (*DpnII*, *NlaIII*, *BamHI*, *BglII*, *HindIII*), and of oligonucleotide size. Designed  
 339 oligonucleotides are then quality filtered using MIG or AltSort which allows integration with  
 340 chromatin data. AltSort automatically selects oligonucleotides on recommended BLAT density,  
 341 duplication, and repeat values which can be manually adjusted.

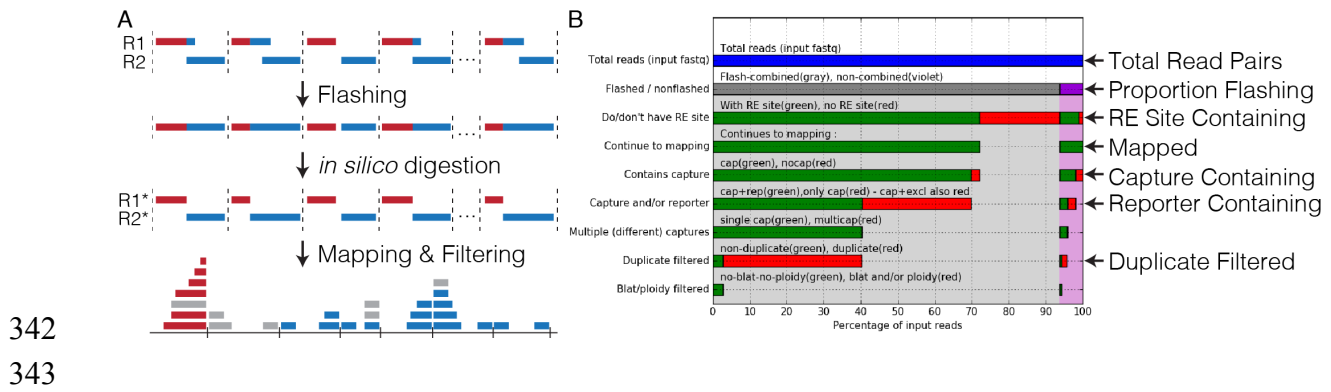

**Figure 3 | CCseqBasic extracts informative data from 3C sequence reads. (a)** 3C libraries are analysed by reconstructing original fragments by flashing. Subsequent *in silico* digestion of reads resolves chimeric fragments, and allows mapping with bowtie. Mapped reads are identified as “Capture” (red): coming from a targeted viewpoint, or “Reporter” (blue): coming from an interacting fragment. Capture-reporter read pairs are then filtered for PCR duplicates and off target capture sites (grey). **(b)** 3C library and capture quality metrics are reportable as fractions of total reads to allow easy tracking of experimental success, or where necessary, facilitate troubleshooting.

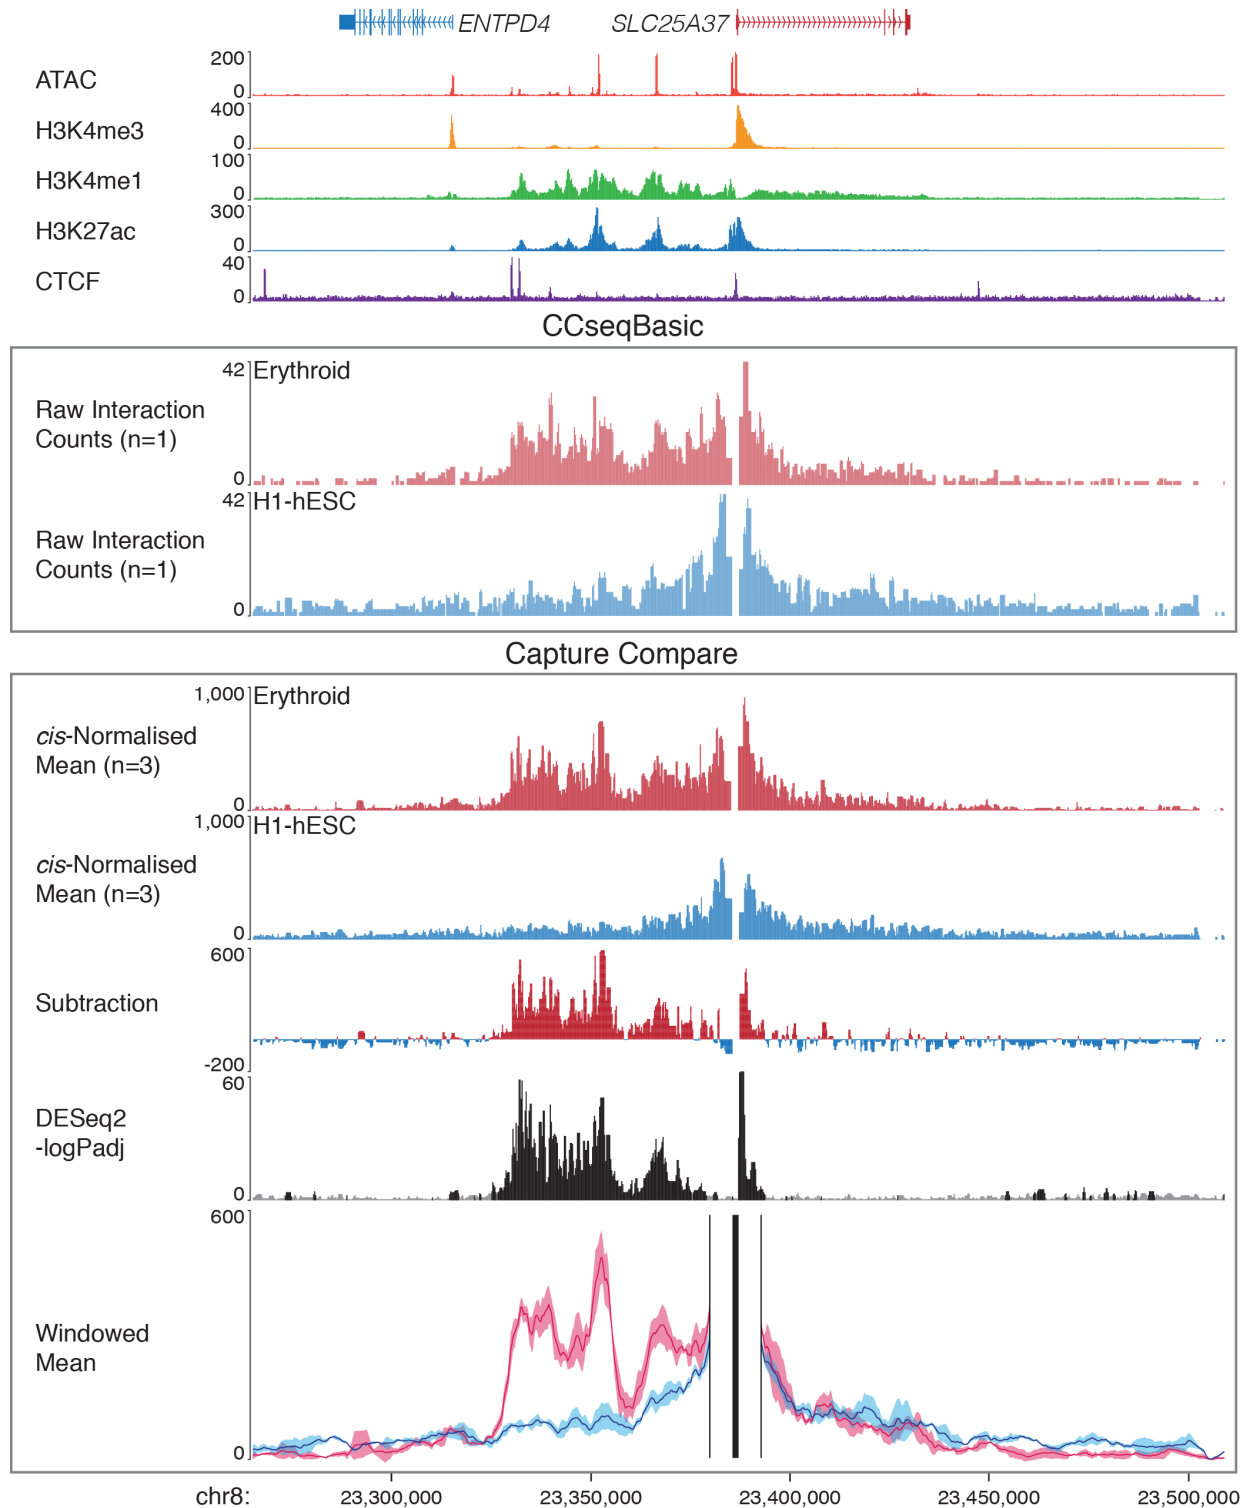

352

353

354

355

356

357

358

359

360

**Figure 4 | CaptureCompare allows statistical analysis of experiments.** The outputs of CCseqBasic and CaptureCompare can be directly loaded into UCSC for interpretation with chromatin epigenetic data. Example output is a Capture-C experiment from the viewpoint of the human mitoferrin gene *SLC25A37*. Output tracks include raw reporter counts, *cis*-normalised reporter counts, subtraction between comparison samples, and -logPadj values from DESeq2 on a per fragment basis. A pdf of windowed mean interactions with standard deviations is also provided. For DESeq2, significantly different fragments have been coloured black (FDR  $q < 0.05$ ).



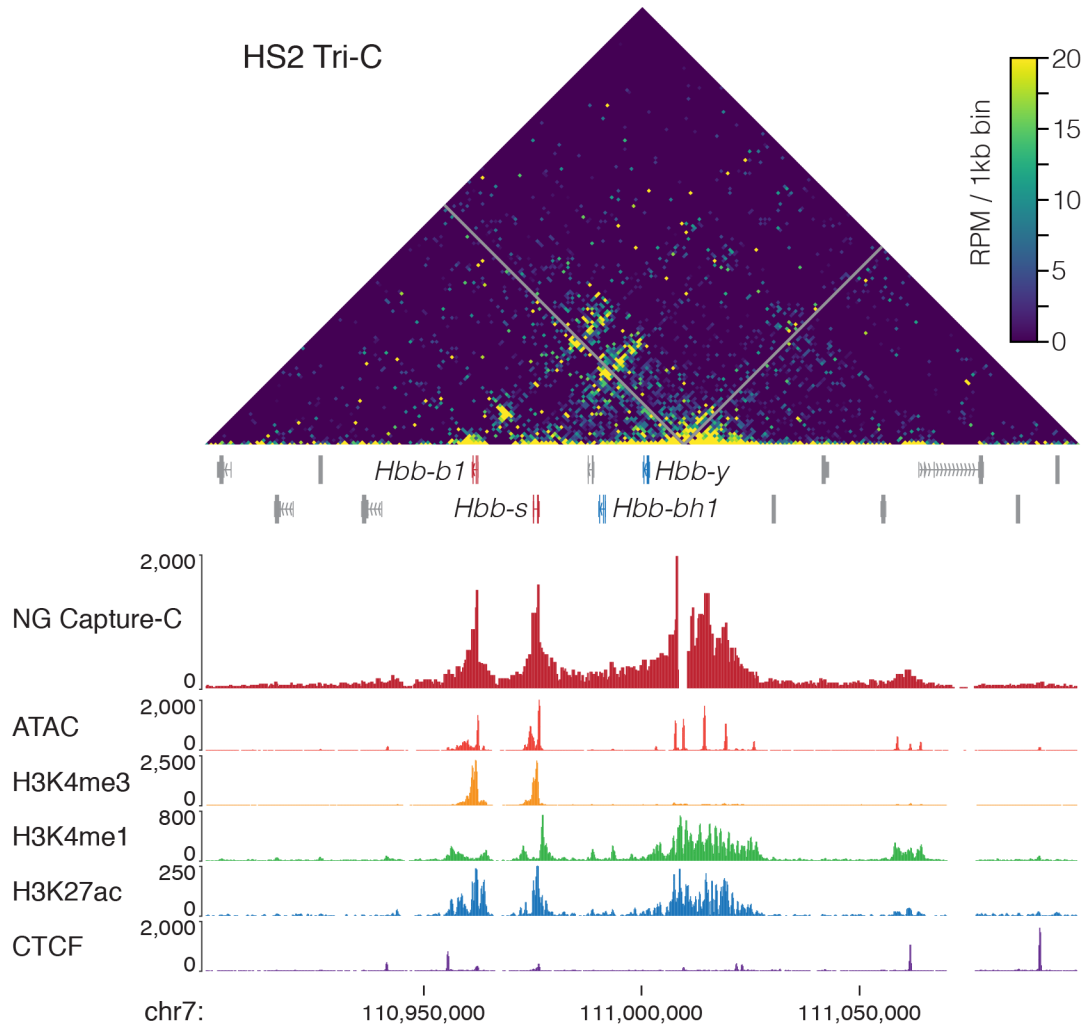

361

362

363 **Figure 5 | Detection of multi-way interaction hubs with Tri-C analysis.** The output  
364 interaction map from Tri-C analysis of the viewpoint from the HS2 element of the mouse beta-  
365 globin Locus Control Region (LCR) shows concurrent interaction between HS2, the active beta-  
366 globin genes, and other elements within the LCR.

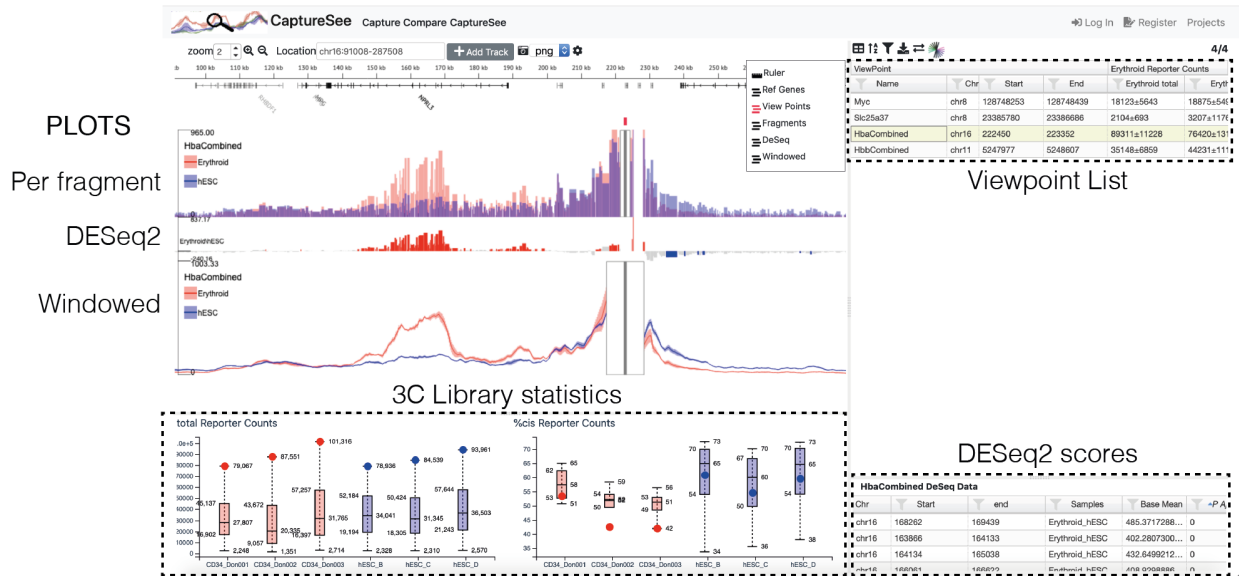

367

368

369 **Figure 6 | Data exploration and sharing with CaptureSee.** Data is loaded into CaptureSee  
 370 using the CaptureCompare generated public hub. Within CaptureSee users can quickly move  
 371 between viewpoints; with both per fragment and widowed views. In addition to 3C profiles,  
 372 reporter counts and percent *cis* interactions are provided for each sample 3C library. DESeq2  
 373 logPadj scores are provided on a per fragment basis and can be filtered for level of significance.
